# Supplementary material for: Balancing care and conflict: towards a better understanding of maternal aggression in canaries
Source: Research Square preprint supplement (doi:10.21203/rs.3.rs-6479850/v1), 2025-05-15
Supplement: Supplementary file 1 [file 656bc4cbf31fe4dbf8139db5.docx]

SUPPLEMENTARY INFORMATION

**Balancing care and conflict: towards a better understanding of maternal aggression in canaries**

*Garcia-Co, C.1,2; Verbruggen, F.2; Morales, J.3; Müller, W.1

Clara.GarciaiCo@uantwerpen.be

1 Department of Biology, Behavioural Ecology and Ecophysiology Research Group. University of Antwerp (Belgium).

2 Department of Experimental Psychology, EcoBird Lab. University of Ghent (Belgium)

3 Department of Evolutionary Ecology, National Museum of Natural Sciences, Spanish National Research Council (MNCN-CSIC; Madrid, Spain).

**Supplementary Table S1.** Effects of experiencing early-life maternal aggression on growth. Outcome of a linear mixed effect model (polynomial, 4th order). Bold values indicate P< 0.05. This model includes the non-sexed individuals so sex has three categories (females, F; males, M; and non-sexed).

|  |  | **Growth trajectory** | | |
| --- | --- | --- | --- | --- |
|  | *Estimate (SE)* | *F* | *df* | *P* |
| Intercept | 295.12 (168.15) | - | - | - |
| poly (Age , k=4) | 11.23 (1.14) | 579.20 | (4, 186.62) | **<0.001** |
| Maternal aggression | -0.03 (0.08) | 0.21 | (1, 241.09) | 0.64 |
| Nestling sex | -0.01 (0.05) | 0.01 | (1, 531.54) | 0.89 |
| Year | -0.14 (0.08) | 2.87 | (1, 41.14) | 0.09 |
| Hatching order | -0.04 (0.04) | 0.91 | (1, 316.36) | 0.33 |
| Maternal aggression : Age | 0.03 (0.01) | 6.97 | (1, 176.98) | **0.009** |
| Nestling sex: Age | -0.01 (0.01) | 0.94 | (1, 222.77) | 0.33 |

**Supplementary Table S2** Full model of the effects of exerting maternal aggression on parental investment(i.e., clutch size of both the first and the second clutch), and time interval between the first and the second clutch. Outcome of a linear mixed model for the clutch size, and outcome of a linear model for the interval between clutches. Bold values indicate P<0.05.

| **Clutch size** | | | | |
| --- | --- | --- | --- | --- |
|  | *Estimate (SE)* | *df* | *t* | *P* |
| Intercept | 4.62 (0.18) | 140.99 | 24.95 | **<0.001** |
| Maternal aggression | -0.45 (0.29) | 137.56 | -1.52 | 0.12 |
| Clutch ID | -0.24 (0.18) | 89 | -1.28 | 0.20 |
| Year | -0.29 (0.21) | 87 | -1.34 | 0.18 |
| Maternal aggression: Clutch ID | -0.21 (0.29) | 89 | -0.74 | 0.45 |
| Maternal aggression: Year | 0.33 (0.34) | 87 | 0.97 | 0.33 |
| **Time interval between clutches** | | | | |
|  | *Estimate (SE)* | *t* |  | *P* |
| Intercept | 36.36 (1.57) | 23.07 | | **<0.001** |
| Maternal aggression | -1.23 (2.20) | -0.56 | | 0.57 |
| Brood size day 10 | 0.40 (0.45) | 0.89 | | 0.37 |
| Year | 0.79 (0.94) | 0.84 | | 0.4 |
| Maternal aggression: Brood size d10 | 0.68 (0.69) | 0.98 | | 0.32 |
| Maternal aggression: Year | -1.71 (1.46) | -1.17 | | 0.24 |
